# Supplementary material
Source: Springer Nature journal article supplement (https://www.springermedizin.de/resource/supplementary/12873_2014_212_MOESM1_ESM.pdf/9431662)
Supplement: MOESM1 [file 9431662]

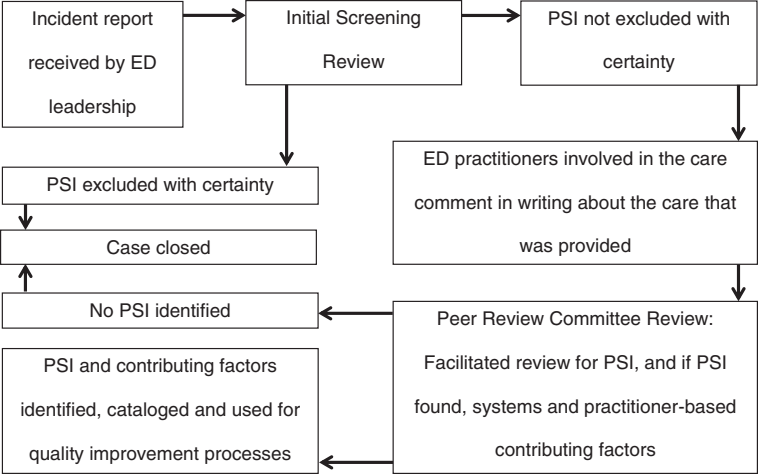

Incident report  
received by ED  
leadership

Initial Screening  
Review

PSI not excluded with  
certainty

PSI excluded with certainty

Case closed

No PSI identified

PSI and contributing factors  
identified, cataloged and used for  
quality improvement processes

ED practitioners involved in the care  
comment in writing about the care that  
was provided

Peer Review Committee Review:  
Facilitated review for PSI, and if PSI  
found, systems and practitioner-based  
contributing factors
